# Supplementary material
Source: PubMed Central journal article supplement (PMC5108364)
Supplement: NIHMS821681-supplement-sup1.pdf [file NIHMS821681-supplement-sup1.pdf]

**Cell Chemical Biology, Volume 23**

**Supplemental Information**

**Endoplasmic Reticulum Proteostasis Influences  
the Oligomeric State of an Amyloidogenic  
Protein Secreted from Mammalian Cells**

**John J. Chen, Joseph C. Genereux, Eul Hyun Suh, Vincent F. Vartabedian, Bibiana Rius, Song Qu, Maria T.A. Dendle, Jeffery W. Kelly, and R. Luke Wiseman**

1 **SUPPLEMENTAL FIGURES**

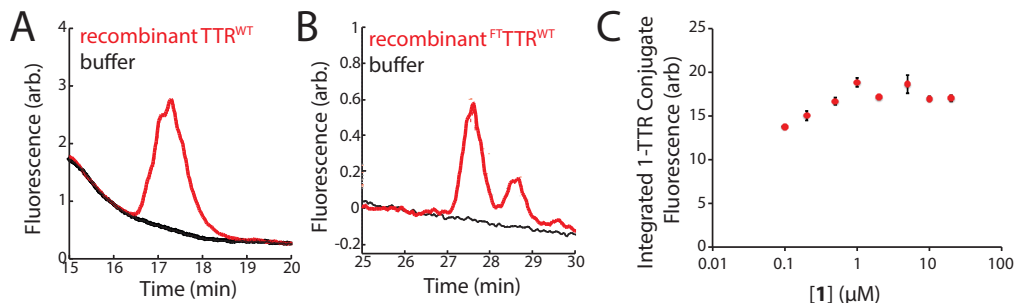

D

| Mass Diff (vs. FT-TTR <sup>WT</sup> ) | Modification              | Predicted Site of Modification | Relative Abundance (%) |
|---------------------------------------|---------------------------|--------------------------------|------------------------|
| +199                                  | +SO <sub>3</sub> and +Cys | Tyr and Cys10                  | 38 +/- 4               |
| +80                                   | +SO <sub>3</sub>          | Tyr                            | 31 +/- 5               |
| +119                                  | Cys                       | Cys10                          | 12 +/- 2               |
| +160                                  | 2 x SO <sub>3</sub>       | Tyr                            | 8 +/- 2                |
| Parent                                |                           |                                | 6 +/- 3                |

2  
3  
4 **Figure S1 (Supplement to Figure 1).**

- 5 **A.** Plot showing the compound 1-TTR conjugate fluorescence of recombinant TTR<sup>WT</sup> (200 nM) in cell  
6 culture media separated by anion exchange chromatography. Compound 1 (10 μM) was added to  
7 unconditioned media containing recombinant TTR<sup>WT</sup> for 16 h prior to analysis by anion exchange  
8 chromatography.
- 9 **B.** Plot showing the compound 1-TTR conjugate fluorescence of recombinant FT-TTR<sup>WT</sup> (200 nM) in cell  
0 culture media separated by anion exchange chromatography. Compound 1 (10 μM) was added to  
1 unconditioned media containing recombinant FT-TTR<sup>WT</sup> for 16 h prior to analysis by anion exchange  
2 chromatography.
- 3 **C.** Plot showing the compound 1-TTR conjugate fluorescence of FT-TTR<sup>WT</sup> in conditioned media.  
4 Compound 1 at the indicated concentration was added to conditioned media containing FT-TTR<sup>WT</sup> for 16  
5 h prior to analysis by anion exchange chromatography.
- 6 **D.** Table showing modifications of FT-TTR<sup>WT</sup> identified by mass spectrometric analysis of TTR  
7 immunopurified from media conditioned for 16 h on HEK293 cells expressing FT-TTR<sup>WT</sup>. The mass  
8 difference from parent, modification, predicted modification site and relative abundance are shown.  
9 These modified TTRs integrate into heterotetramers to comprise the 8 distinct peaks identified by  
0 compound 1-TTR conjugate fluorescence in UPLC anion exchange chromatograms, as shown in **Fig.**

1 **1D.**

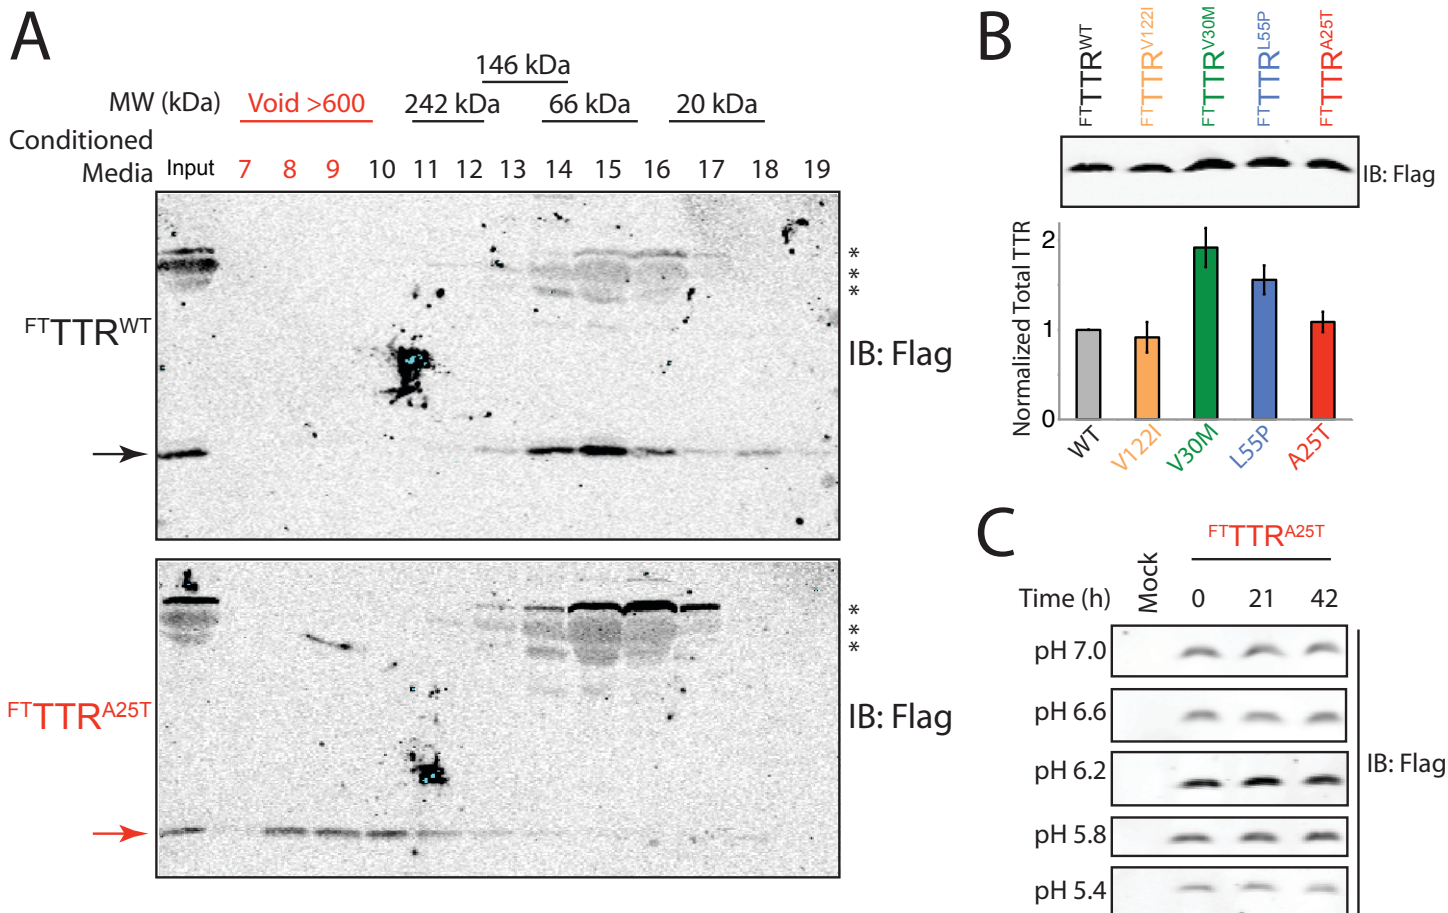

**Figure S2 (Supplement to Figure 2).**

**A.** Immunoblot of fractions collected from media conditioned on HEK293 cells expressing  $^{FT}TTR^{WT}$  (top) or  $^{FT}TTR^{A25T}$  (bottom) separated by gel filtration chromatography. The migration of molecular weight standards are shown above. The arrows show  $^{FT}TTR$ . The asterisk (\*) identifies non-TTR background bands that cross-react with this antibody in conditioned media. The migration of  $^{FT}TTR^{WT}$  is identical to that observed for recombinant  $^{FT}TTR^{WT}$  (Chen et al., 2014).

**B.** Representative SDS-PAGE immunoblot and quantification of total TTR levels in media conditioned for 16 h on HEK293 cells expressing  $^{FT}TTR^{WT}$  (black),  $^{FT}TTR^{V122I}$  (orange),  $^{FT}TTR^{V30M}$  (green),  $^{FT}TTR^{L55P}$  (blue), or  $^{FT}TTR^{A25T}$  (red). The graph shows relative amounts of the different TTR variants normalized to  $^{FT}TTR^{WT}$ . Error bars show SEM for n=3.

**C.** Immunoblot of  $^{FT}TTR^{A25T}$  incubated in conditioned media at 37 °C for the indicated time. The pH of the media was adjusted as indicated to induce protein unfolding. Note that the  $^{FT}TTR^{A25T}$  signal is not lost during this incubation at any pH, indicating that no proteolysis is observed.

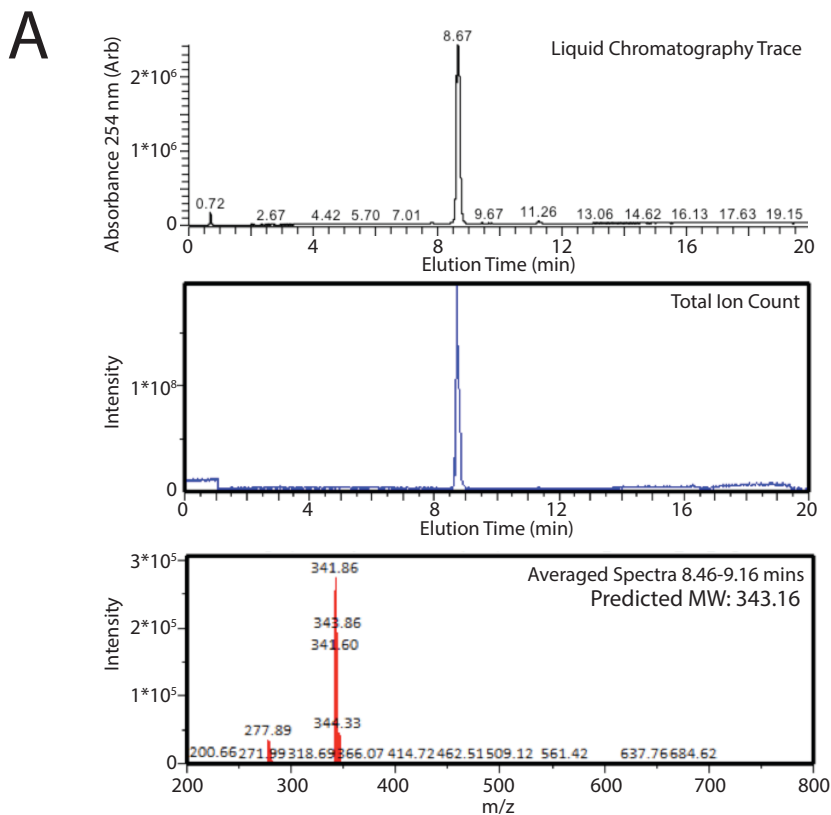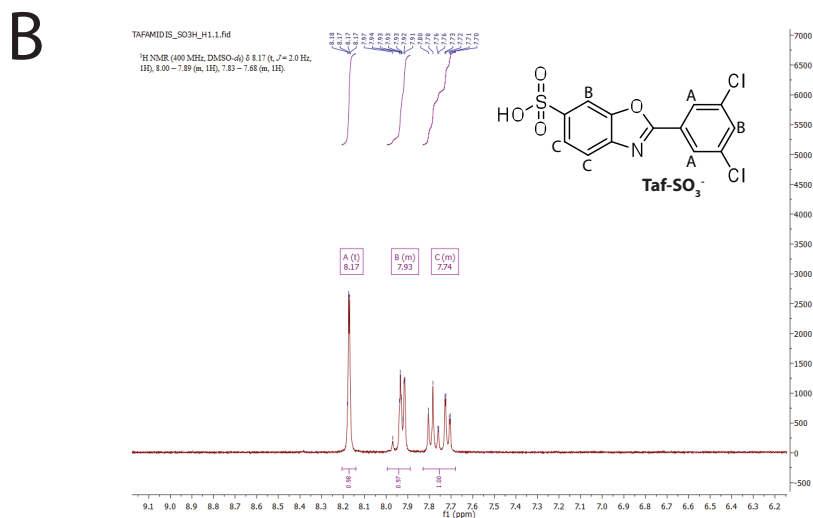

**Figure S3 (Supplement to Figure 4)**

**A.** Liquid chromatography (LC) trace (top), total ion count (middle), and mass spectrometry analysis (bottom) of Taf-SO<sub>3</sub><sup>-</sup> analyzed by LC-MS. The LC-MS method is as follows: 1) 10% acetonitrile (ACN) / 90% H<sub>2</sub>O + 0.1% NH<sub>4</sub>OH for 2 min, 2) linear gradient to 90% ACN / 10% H<sub>2</sub>O + 0.1% NH<sub>4</sub>OH over 10 min, 3) 90% ACN / 10% H<sub>2</sub>O + 0.1% NH<sub>4</sub>OH for 8 min. Mass spectrometry analysis was performed in negative mode scanning molecular weights between 200-800 Da.

**B.** Proton NMR for Taf-SO<sub>3</sub><sup>-</sup>.

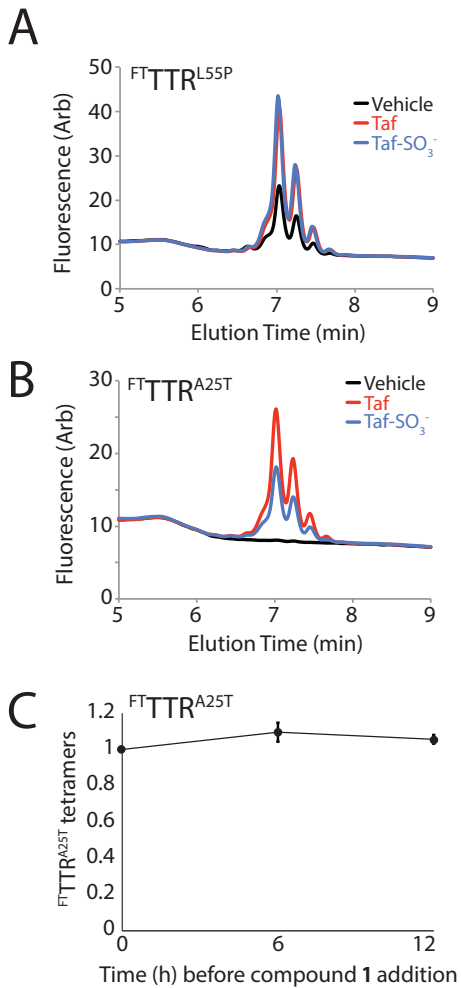

6  
7

8 **Figure S4 (Supplement to Figure 5).**

- 9 **A.** Representative plot showing the compound 1-TTR conjugate fluorescence of media conditioned for 16  
0 h on HEK293 cells expressing FTTTR<sup>L55P</sup> in the presence of vehicle (black), Taf (10 μM; red), or Taf-  
1 SO<sub>3</sub><sup>-</sup> (10 μM; blue). Compound 1 (10 μM) was added to conditioned media for 16 h prior to analysis by  
2 anion exchange chromatography.
- 3 **B.** Representative plot showing the compound 1-TTR conjugate fluorescence of media conditioned for 16  
4 h on HEK293 cells expressing FTTTR<sup>A25T</sup> in the presence of vehicle (black), Taf (10 μM; red), or Taf-  
5 SO<sub>3</sub><sup>-</sup> (10 μM; blue). Media was conditioned for 16 h prior to collection. Compound 1 (10 μM) was added  
6 to conditioned media for 16 h prior to analysis by anion exchange chromatography.
- 7 **C.** Plot showing relative tetramer levels (measured by compound 1-TTR conjugate fluorescence UPLC  
8 assay) of media conditioned on HEK293 cells expressing FTTTR<sup>A25T</sup> in the presence of Taf-SO<sub>3</sub><sup>-</sup> (10  
9 μM). The x-axis shows the time media was incubated prior to addition of compound 1 (14.4 μM).

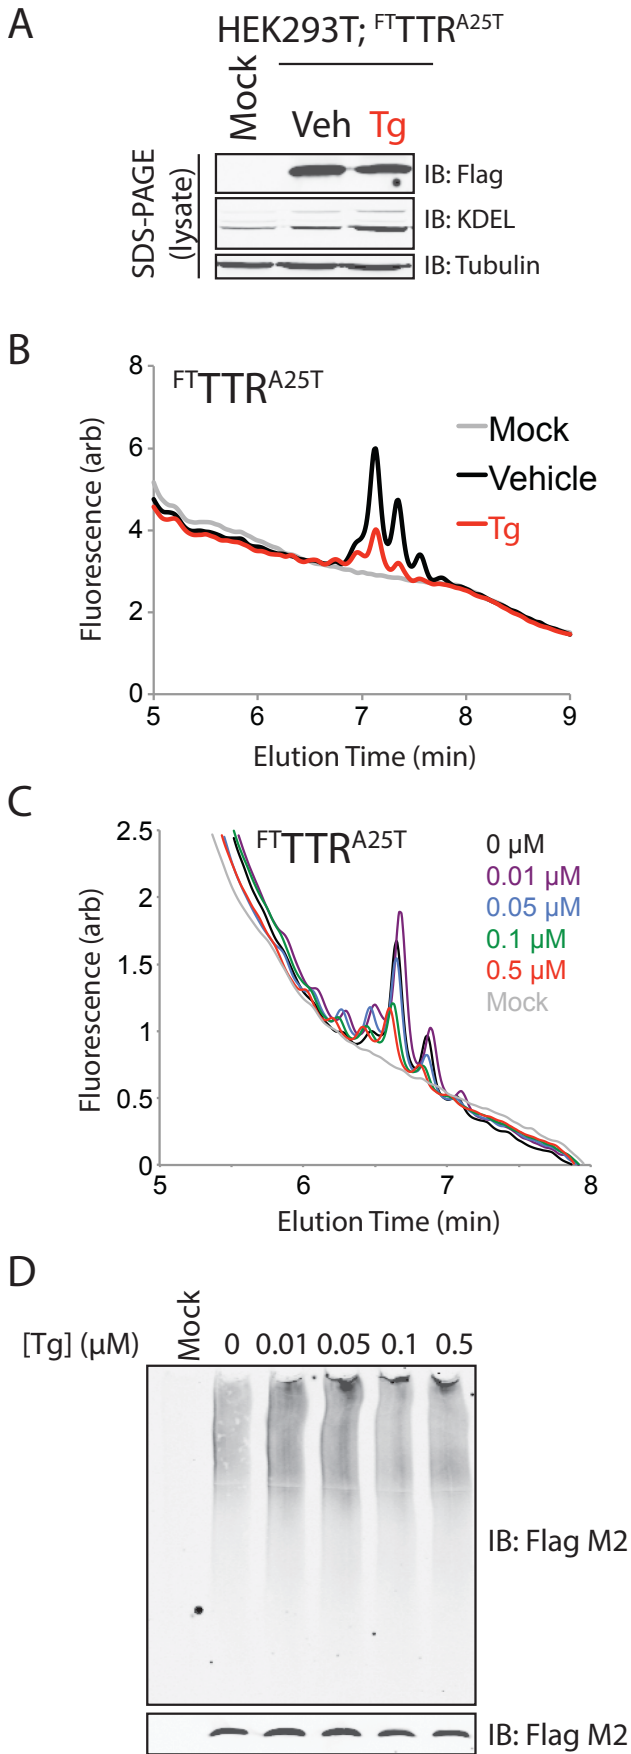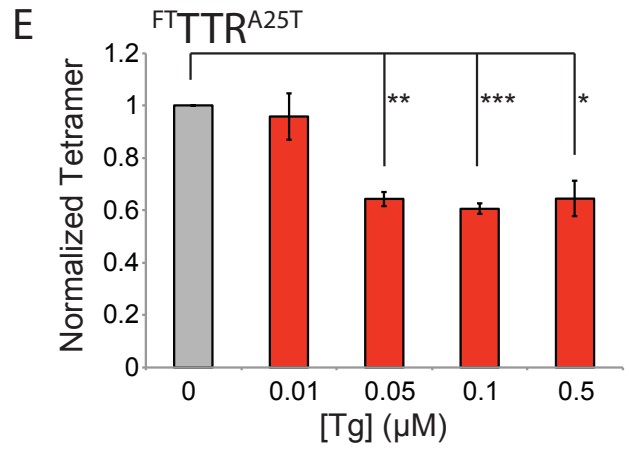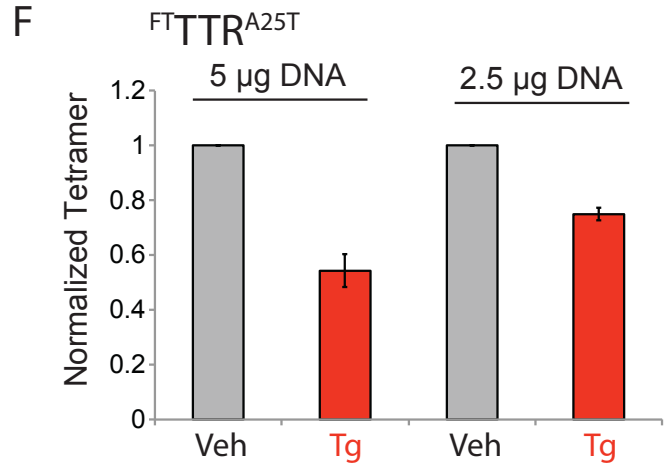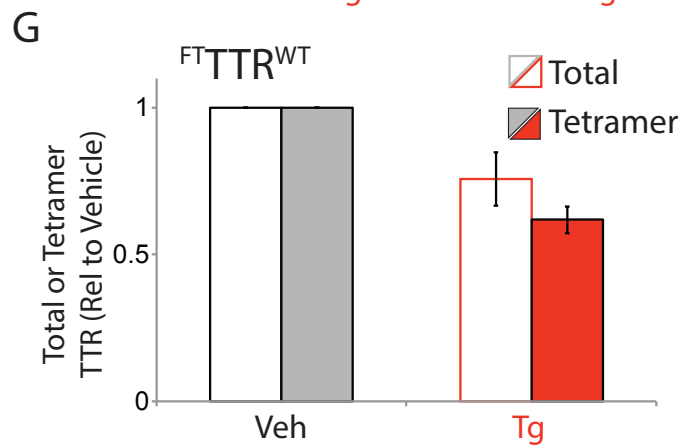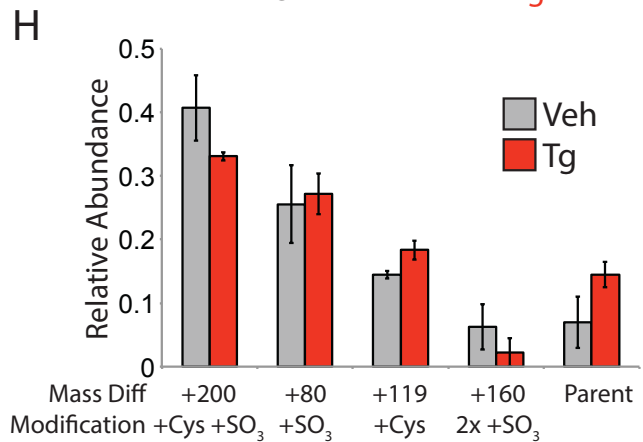

2 **Figure S5 (Supplement to Figure 6)**

3 **A.** Immunoblot of lysates prepared from HEK293 cells expressing  $^{FT}TTR^{A25T}$  treated with vehicle or Tg (0.5  
4  $\mu$ M). The Tg-dependent increase in BiP is shown in the KDEL immunoblot panel.

5 **B.** Representative plot showing the compound 1-TTR conjugate fluorescence of media conditioned for 16  
6 h on HEK293 cells expressing  $^{FT}TTR^{A25T}$  conditioned in the presence of vehicle (black) or Tg (0.5  $\mu$ M;  
7 red). Media was conditioned the presence of Taf-SO<sub>3</sub><sup>-</sup> (10  $\mu$ M). Compound 1 (10  $\mu$ M) was added to  
8 conditioned media for 16 h prior to analysis by anion exchange chromatography.

9 **C.** Representative plot showing the compound 1-TTR conjugate fluorescence of media conditioned for 16  
0 h on HEK293 cells expressing  $^{FT}TTR^{A25T}$  conditioned in the presence of vehicle (black) or increasing Tg  
1 concentration, as indicated. Media was conditioned the presence of Taf-SO<sub>3</sub><sup>-</sup> (10  $\mu$ M). Compound 1 (10  
2  $\mu$ M) was added to conditioned media for 16 h prior to analysis by anion exchange chromatography.

3 **D.** Representative CN-PAGE and SDS-PAGE immunoblot of media conditioned for 16 h on HEK293 cells  
4 expressing  $^{FT}TTR^{A25T}$  conditioned in the presence of vehicle (black) or increasing Tg concentration, as  
5 indicated. Media was conditioned the presence of Taf-SO<sub>3</sub><sup>-</sup> (10  $\mu$ M).

6 **E.** Graph showing normalized TTR tetramers in the conditioned media described in **Fig. S5C,D**.  
7 Normalized tetramers were calculated by dividing the relative tetramer levels by the total amount of  
8 TTR in each sample measured by SDS-PAGE. This normalization is necessary to account for the  
9 reduced total  $^{FT}TTR^{A25T}$  levels observed in Tg-treated cells. Error bars show SEM for n=3. \*p<0.05,  
0 \*\*p<0.01, \*\*\*p<0.005.

1 **F.** Graph showing normalized TTR tetramers in the conditioned media prepared on HEK293 cells  
2 transfected with 5 or 2.5  $\mu$ g DNA and treated with vehicle (grey) or Tg (0.5  $\mu$ M; red), as indicated.  
3 Normalized tetramers were calculated by dividing the relative tetramer levels by the total amount of  
4 TTR in each sample measured by SDS-PAGE. This normalization is necessary to account for the  
5 reduced total  $^{FT}TTR^{A25T}$  levels observed in Tg-treated cells. Error bars show SEM for n=2.

6 **G.** Graph showing total (open bars; measured by SDS-PAGE) or tetrameric (closed bars; measured by  
7 integrating compound 1-TTR conjugate fluorescence from UPLC) TTR in media conditioned for 16 h on  
8 HEK293 cells expressing  $^{FT}TTR^{WT}$  in the presence of vehicle (grey) or Tg (0.5  $\mu$ M; red). Media was

9 conditioned in the presence of Taf-SO<sub>3</sub><sup>-</sup> (10 μM). All data are shown relative to vehicle-treated controls.

0 Error bars show SEM for n=6.

1 **H.** Graph showing the posttranslational modifications of <sup>FT</sup>TTR<sup>WT</sup> immunopurified from media conditioned  
2 on HEK293T cells expressing <sup>FT</sup>TTR<sup>WT</sup> and treated in the presence of vehicle (grey) or Tg (0.5 μM;  
3 red). Modifications of <sup>FT</sup>TTR<sup>WT</sup> were determined using the same LC-MS approach described in **Fig. 1E**.

4



## 5 SUPPLEMENTAL EXPERIMENTAL PROCEDURES

### 6 *Antibodies*

7 The antibodies used for immunoblotting were monoclonal mouse M2 anti-FLAG (Sigma), monoclonal mouse  
8 anti-tubulin (Sigma) and polyclonal rabbit anti-TTR antibody (Dako).

9

### 0 *Cell Culture, Lysates, Plasmids, and Transfections*

1 HEK293 cells used in this study were purchased from the ATCC and cultured in Dulbecco's modified Eagle's  
2 medium (DMEM) supplemented with glutamine, penicillin/streptomycin, and 10% fetal bovine serum, as  
3 previously described (Shoulders et al., 2013). All TTR point mutations were incorporated into the previously  
4 described FLAG<sub>2</sub>.TTR.pcDNA3.1 vector through site-directed mutagenesis. Transient transfections of <sup>FT</sup>TTR  
5 variants were performed by calcium phosphate transfection using established procedures (Shoulders et al.,  
6 2013). Whole cell lysates were prepared in Lysis Buffer (20 mM HEPES [pH 7.4], 100 mM NaCl, 1 mM EDTA,  
7 1% Triton X-100 supplemented with EDTA-free protease inhibitors [Roche]). Protein concentration in lysates  
8 was normalized using the Bio-Rad protein assay.

9

### 0 *Characterization of TTR modifications*

1 <sup>FT</sup>TTR<sup>WT</sup> was immunopurified from cell-conditioned media by overnight incubation with protein A resin  
2 covalently conjugated to anti-TTR antibody at 4 °C, as previously described (Sekijima et al., 2003). The beads  
3 were washed four times with 10 mM Tris pH 8.0 100 mM NaCl 0.05% saponin and two times with 10 mM Tris  
4 pH 8.0 100 mM NaCl. <sup>FT</sup>TTR<sup>WT</sup> was then eluted overnight using 100 mM triethylamine pH 11.5 with gentle  
5 shaking. For LC-MS analysis, eluates were separated using a 5 µm ID 300 Å pore size C8 RP-HPLC column  
6 (Agilent) over a 15%/min linear acetonitrile gradient and analyzed on an 1100 MSD SL mass spectrometer  
7 (Agilent). Deconvolution parameters were set to 10 kDa ≤ MW ≤ 20 kDa, q ≤ 50, and minimum 6 peaks for  
8 identification.

9

### 0 *Recombinant TTR Aggregation Assay*

1 Recombinant TTR<sup>WT</sup> (7.2 µM tetramer) in 10 mM Tris pH 7.5 100 mM NaCl 1 mM EDTA was incubated for 1 h  
2 with the indicated equivalent of Taf-SO<sub>3</sub><sup>-</sup> or Taf (1 equivalent = 7.2 µM molecule). The protein was then diluted

3 1:1 into 50 mM Acetate pH 4.4 100 mM NaCl 1 mM EDTA resulting in a final tetramer concentration of 3.6  $\mu$ M.  
4 The sample was then incubated for 72 h at room temperature. Aggregation was measured by turbidity at 330  
5 and 400 nm, as previously described (Razavi et al., 2003; Sekijima et al., 2005).

6

7 **SUPPLEMENTAL REFERENCES**

- 8 Chen, J.J., Genereux, J.C., Qu, S., Hulleman, J.D., Shoulders, M.D., and Wiseman, R.L. (2014). ATF6  
9 activation reduces the secretion and extracellular aggregation of destabilized variants of an amyloidogenic  
0 protein. *Chemistry & biology* 21, 1564-1574.
- 1 Razavi, H., Palaninathan, S.K., Powers, E.T., Wiseman, R.L., Purkey, H.E., Mohamedmohaideen, N.N.,  
2 Deechongkit, S., Chiang, K.P., Dendle, M.T., Sacchettini, J.C., *et al.* (2003). Benzoxazoles as transthyretin  
3 amyloid fibril inhibitors: synthesis, evaluation, and mechanism of action. *Angewandte Chemie* 42, 2758-2761.
- 4 Sekijima, Y., Hammarstrom, P., Matsumura, M., Shimizu, Y., Iwata, M., Tokuda, T., Ikeda, S., and Kelly, J.W.  
5 (2003). Energetic characteristics of the new transthyretin variant A25T may explain its atypical central nervous  
6 system pathology. *Laboratory investigation; a journal of technical methods and pathology* 83, 409-417.
- 7 Sekijima, Y., Wiseman, R.L., Matteson, J., Hammarstrom, P., Miller, S.R., Sawkar, A.R., Balch, W.E., and  
8 Kelly, J.W. (2005). The biological and chemical basis for tissue-selective amyloid disease. *Cell* 121, 73-85.
- 9
